# Supplementary material for: Coordination framework materials fabricated by the self-assembly of Sn(iv) porphyrins with Ag(i) ions for the photocatalytic degradation of organic dyes in wastewater
Source: Royal Society of Chemistry journal article supplement (doi:10.1039/d1qi01615f), 2022-01-01
Supplement: d1qi01615f1.pdf [file d1qi01615f1.pdf]

## Electronic Supplementary Information

# Coordination framework materials fabricated by the self-assembly of Sn(IV) porphyrins with Ag(I) ions for the photocatalytic degradation of organic dyes in wastewater

Nirmal Kumar Shee, Hwa Jin Jo and Hee-Joon Kim\*

*Department of Applied Chemistry, Kumoh National Institute of Technology  
61 Daehak-ro, Gumi 39177, Republic of Korea*

## List of contents:

**Table S1.** Crystallographic data and structure refinements for **1** and **2**.

**Table S2.** Selected bond lengths [Å] and angles [°] for **1**.

**Table S3.** Selected bond lengths [Å] and angles [°] for **2**.

**Fig. S1** UV-vis absorption spectra of Sn(OH)<sub>2</sub>TPyP and Sn(INA)<sub>2</sub>TPyP in chloroform.

**Fig. S2** Fluorescence spectra of Sn(OH)<sub>2</sub>TPyP and Sn(INA)<sub>2</sub>TPyP (excited at 560 nm) in chloroform.

**Fig. S3** FT-IR spectra of **1** and **2**.

**Fig. S4** TGA curves of **1** and **2**.

**Fig. S5** Powder X-ray diffraction (PXRD) patterns of **1** and **2**.

**Fig. S6** Adsorption and desorption isotherms of N<sub>2</sub> for **1** and **2** at 77 K.

**Fig. S7** Time-dependent absorption spectra of MB in the presence of **2** under visible light irradiation.

**Fig. S8** Kinetics for the photocatalytic degradation of MB under visible light irradiation by photocatalysts **1** and **2**.

**Fig. S9** Time-dependent absorption spectra of AM in the presence of **2** under visible light irradiation.

**Fig. S10** Kinetics for the photocatalytic degradation of AM under visible light irradiation by photocatalysts **1** and **2**.

**Fig. S11** Time-dependent absorption spectra of BCG in the presence of **2** under visible light irradiation.

**Fig. S12** Kinetics for the photocatalytic degradation of BCG under visible light irradiation by photocatalysts **1** and **2**.

**Fig. S13** Catalytic cycles (up to 10 cycles) for photo-catalyst **2** for the degradation of AM dye.

**Fig. S14** Powder X-ray diffraction (PXRD) patterns of **1** and **2** after use for photocatalytic degradation of AM dye.

**Fig. S15** FE-SEM images of photocatalyst **1** and **2** after the degradation of AM dye.

**Fig. S16** Concentration effect of AM dye on the photo-degradation by **2** (5 mg) within 90 min of visible light irradiation.

**Fig. S17** Effect of temperature on the degradation of AM dye by **2**.

**Fig. S18** pH Effect of AM dye solution on the photo-degradation of by **2**.

**Fig. S19** Effect of various scavengers on the degradation of AM dye in the presence of **2** under visible light irradiation.

**Fig. S20** ESI-MS spectrum (negative ion mode) of the reaction mixture of AM in the presence of **2** after 60 min of visible light irradiation.

**Table S1.** Crystallographic data and structure refinements for **1** and **2**.

|                                                                                                                | <b>1</b>                                                                         | <b>2</b>                                                                                                         |
|----------------------------------------------------------------------------------------------------------------|----------------------------------------------------------------------------------|------------------------------------------------------------------------------------------------------------------|
| Empirical formula                                                                                              | C <sub>40</sub> H <sub>24</sub> Ag <sub>2</sub> N <sub>8</sub> O <sub>2</sub> Sn | C <sub>58</sub> H <sub>38</sub> Ag <sub>2</sub> F <sub>6</sub> N <sub>12</sub> O <sub>10</sub> S <sub>2</sub> Sn |
| Formula weight                                                                                                 | 983.1                                                                            | 1575.55                                                                                                          |
| Crystal size (mm <sup>3</sup> )                                                                                | 0.20 × 0.15 × 0.15                                                               | 0.2 × 0.3 × 0.5                                                                                                  |
| <i>T</i> (K)                                                                                                   | 173 (2)                                                                          | 223(2)                                                                                                           |
| Crystal system, Space group                                                                                    | Orthorhombic, <i>Pmna</i>                                                        | Monoclinic, <i>C2/c</i>                                                                                          |
| <i>Cell dimensions</i>                                                                                         |                                                                                  |                                                                                                                  |
| <i>a</i> (Å)                                                                                                   | 19.8288 (15)                                                                     | 17.616(3)                                                                                                        |
| <i>b</i> (Å)                                                                                                   | 17.6770 (14)                                                                     | 24.301 (4)                                                                                                       |
| <i>c</i> (Å)                                                                                                   | 8.5182 (7)                                                                       | 19.874 (4)                                                                                                       |
| $\alpha$ (deg)                                                                                                 | 90.00                                                                            | 90.00                                                                                                            |
| $\beta$ (deg)                                                                                                  | 90.00                                                                            | 108.578 (3)                                                                                                      |
| $\gamma$ (deg)                                                                                                 | 90.00                                                                            | 90.00                                                                                                            |
| <i>V</i> (Å <sup>3</sup> )                                                                                     | 2985.7 (4)                                                                       | 8064 (3)                                                                                                         |
| <i>Z</i> , <i>D<sub>c</sub></i> (g cm <sup>-3</sup> )                                                          | 2, 1.088                                                                         | 4, 1.298                                                                                                         |
| $\mu$ (mm <sup>-1</sup> )                                                                                      | 1.11                                                                             | 0.91                                                                                                             |
| <i>F</i> (000)                                                                                                 | 1096                                                                             | 3120                                                                                                             |
| $\theta$ range (°)                                                                                             | 1.15 to 28.29                                                                    | 2.05 to 28.29                                                                                                    |
| reflections collected                                                                                          | 17461                                                                            | 23423                                                                                                            |
| independent reflections ( <i>R</i> <sub>int</sub> )                                                            | 3710 (0.0635)                                                                    | 9377 (0.041)                                                                                                     |
| absorption correction                                                                                          | None                                                                             | None                                                                                                             |
| data / restraints / parameters                                                                                 | 3710 / 0 / 123                                                                   | 9377 / 3 / 410                                                                                                   |
| GOF on <i>F</i> <sup>2</sup>                                                                                   | 0.9239                                                                           | 1.2774                                                                                                           |
| <i>R</i> <sub>1</sub> , <sup>a</sup> <i>wR</i> <sub>2</sub> <sup>b</sup> [ <i>I</i> > 2 $\sigma$ ( <i>I</i> )] | 0.066, 0.1892                                                                    | 0.091, 0.2826                                                                                                    |
| <i>R</i> <sub>1</sub> , <sup>a</sup> <i>wR</i> <sub>2</sub> <sup>b</sup> (all data)                            | 0.1233, 0.2111                                                                   | 0.1261, 0.3422                                                                                                   |
| Largest peak/hole (e Å <sup>-3</sup> )                                                                         | 1.4586/ -1.6532                                                                  | 8.1412/-7.7329                                                                                                   |

<sup>a</sup>  $R_1 = \frac{\sum \|F_o\| - |F_c|}{\sum |F_o|}$ ; <sup>b</sup>  $wR_2 = \frac{[\sum [w(F_o^2 - F_c^2)^2]]}{[\sum [w(F_o^2)^2]]}^{1/2}$ .

**Table S2.** Selected bond lengths [Å] and angles [°] for **1**.

|            |           |            |           |
|------------|-----------|------------|-----------|
| Sn1-O1     | 2.069(7)  | Sn1-N1     | 2.074(4)  |
| Ag2-N2     | 2.052(14) | Ag3-N3     | 2.166(6)  |
| O1-Sn1-O1  | 180.0(4)  | O1-Sn1-N1  | 88.7(2)   |
| O1-Sn1-N1  | 91.3(2)   | O1-Sn1-N1  | 88.7(2)   |
| O1-Sn1-N1  | 91.3(2)   | N1-Sn1-N1  | 90.3(2)   |
| O1-Sn1-N1  | 91.3(2)   | O1-Sn1-N1  | 88.7(2)   |
| N1-Sn1-N1  | 180.0(8)  | N1-Sn1-N1  | 89.7(2)   |
| O1-Sn1-N1  | 91.3(2)   | O1-Sn1-N1  | 88.7(2)   |
| N1-Sn1-N1  | 89.7(2)   | N1-Sn1-N1  | 180.0(1)  |
| N1-Sn1-N1  | 90.3(2)   | N2-Ag2-N2  | 180.0(10) |
| N3-Ag3-N3  | 180.0(5)  | C2-N1-Sn1  | 125.8(3)  |
| C5-N1-Sn1  | 125.5(4)  | C9-N3-Ag3  | 119.5(4)  |
| C13-N2-Ag2 | 122(2)    | C12-N2-Ag2 | 127.0(16) |

Symmetry codes: (i)  $-x+1, -y+1, -z+1$ ; (ii)  $-x+1, y, z$ ; (iii)  $x, -y+1, -z+1$ ; (iv)  $-x+1, -y+2, -z$ ; (v)  $-x, -y+1, -z+1$ .

**Table S3.** Selected bond lengths [Å] and angles [°] for **2**.

|            |          |            |            |
|------------|----------|------------|------------|
| Sn1-O1     | 2.066(5) | Sn1-N2     | 2.081(5)   |
| Sn1-N1     | 2.087(5) | Ag1-N6     | 2.198(6)   |
| Ag1-N4     | 2.373(9) | Ag2-N3     | 2.216(6)   |
| Ag2-N5     | 2.443(9) |            |            |
| O1-Sn1-O1  | 178.9(3) | O1-Sn1-N2  | 94.7(2)    |
| O1-Sn1-N2  | 86.1(2)  | O1-Sn1-N1  | 94.7(2)    |
| N2-Sn1-N2  | 89.6(3)  | O1-Sn1-N1  | 85.0(2)    |
| O1-Sn1-N1  | 94.2(2)  | N2-Sn1-N1  | 179.7(2)   |
| N2-Sn1-N1  | 90.3(2)  | O1-Sn1-N1  | 94.2(2)    |
| O1-Sn1-N1  | 85.0(2)  | N2-Sn1-N1  | 90.3(2)    |
| N2-Sn1-N1  | 179.7(2) | N1-Sn1-N1  | 89.8(3)    |
| N6-Ag1-N6  | 149.7(4) | N6-Ag1-N4  | 105.16(18) |
| N3-Ag2-N3  | 165.0(3) | N3-Ag2-N5  | 97.48(16)  |
| C23-O1-Sn1 | 129.2(5) | C1-N1-Sn1  | 126.2(4)   |
| C4-N1-Sn1  | 125.2(4) | C14-N2-Sn1 | 125.8(4)   |
| C11-N2-Sn1 | 125.2(4) | C9-N3-Ag2  | 124.5(6)   |
| C8-N3-Ag2  | 118.1(5) | C18-N4-Ag1 | 121.9(5)   |
| C22-N5-Ag2 | 121.3(5) | C27-N6-Ag1 | 118.2(6)   |
| C26-N6-Ag1 | 124.2(5) |            |            |

Symmetry codes: (i)  $-x+2, y, -z+3/2$ ; (ii)  $-x+2, y, -z+1/2$ ; (iii)  $-x+2, -y, -z+1$ ; (iv)  $x+1/2, y+1/2, z$ ; (v)  $x-1/2, y-1/2, z$ .

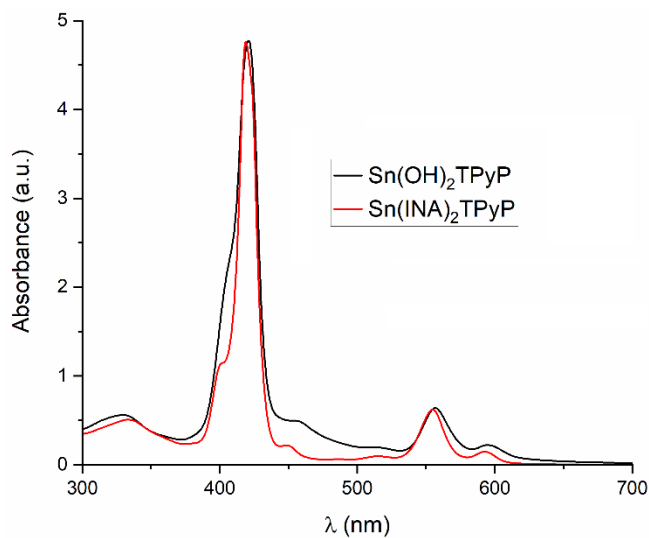**Fig. S1** UV-vis absorption spectra of  $\text{Sn}(\text{OH})_2\text{TPyP}$  and  $\text{Sn}(\text{INA})_2\text{TPyP}$  in chloroform.

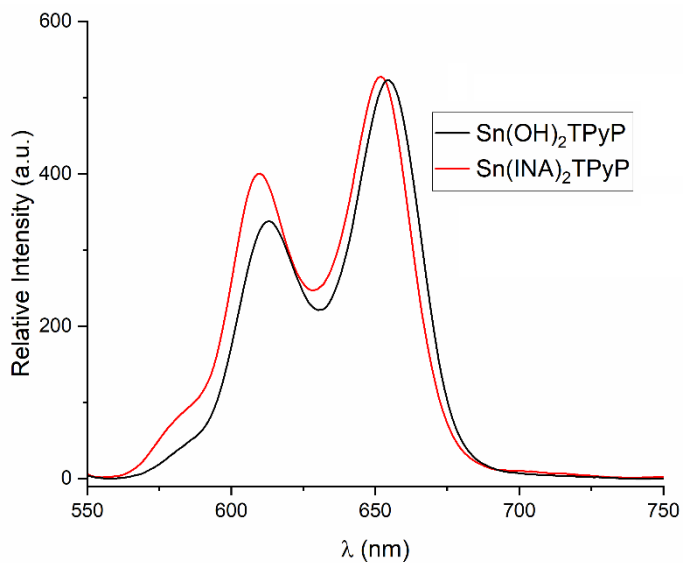

**Fig. S2** Fluorescence spectra of  $\text{Sn(OH)}_2\text{TPyP}$  and  $\text{Sn(INA)}_2\text{TPyP}$  (excited at 560 nm) in chloroform.

---

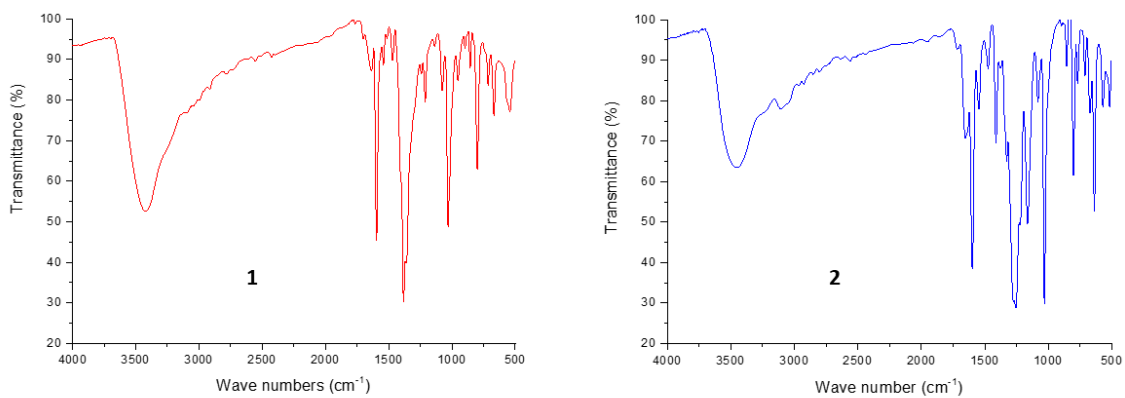

**Fig. S3** FT-IR spectra of **1** and **2**.

---

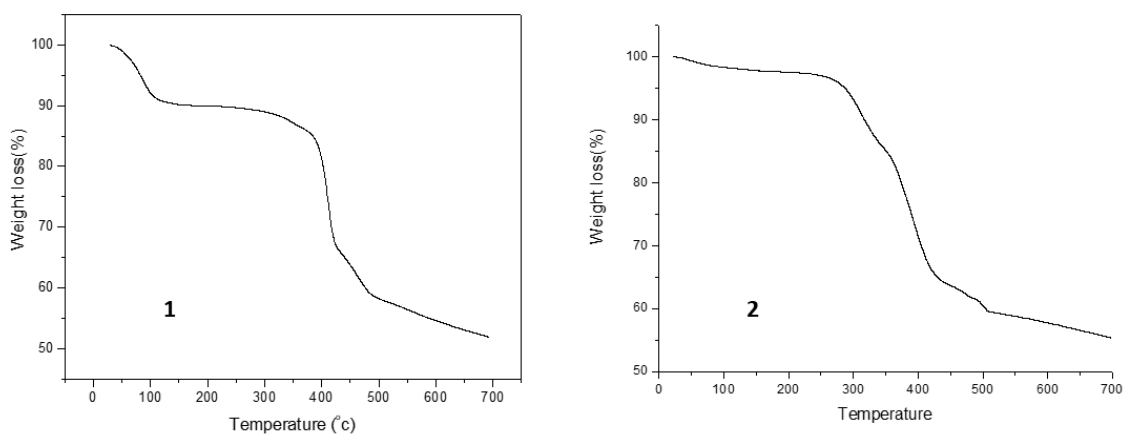

**Fig. S4** TGA curves of **1** and **2**.

---

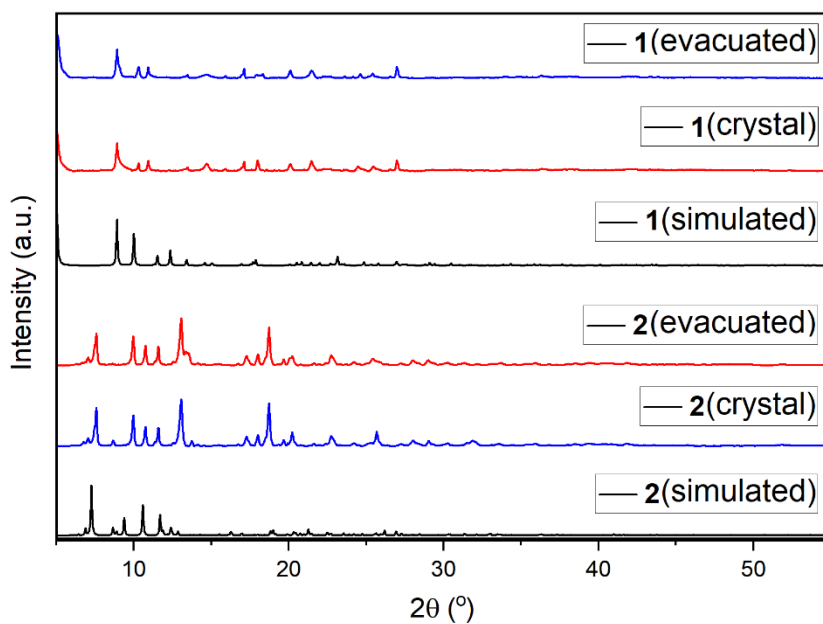

**Fig. S5** Powder X-ray diffraction (PXRD) patterns of **1** and **2**.

---

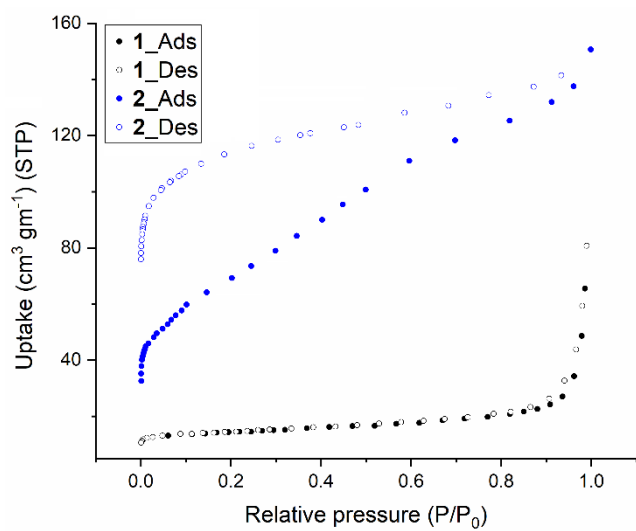

**Fig. S6** Adsorption and desorption isotherms of N<sub>2</sub> for **1** and **2** at 77 K.

---

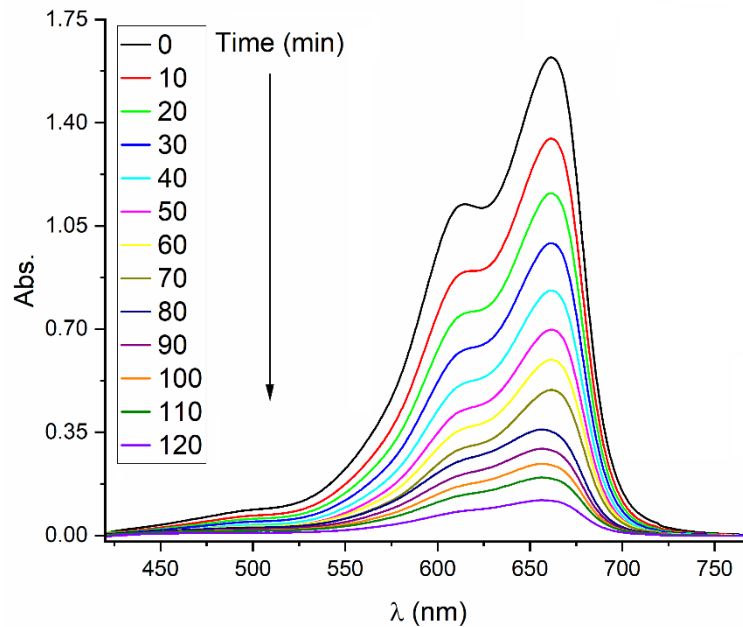

**Fig. S7** Time-dependent absorption spectra of MB in the presence of **2** under visible light irradiation.

---



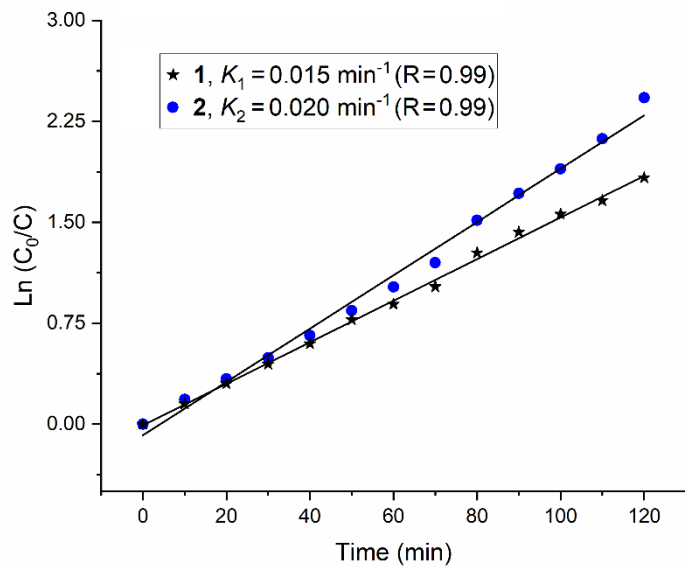

**Fig. S8** Kinetics for the photocatalytic degradation of MB under visible light irradiation by photocatalysts **1** and **2**.

---

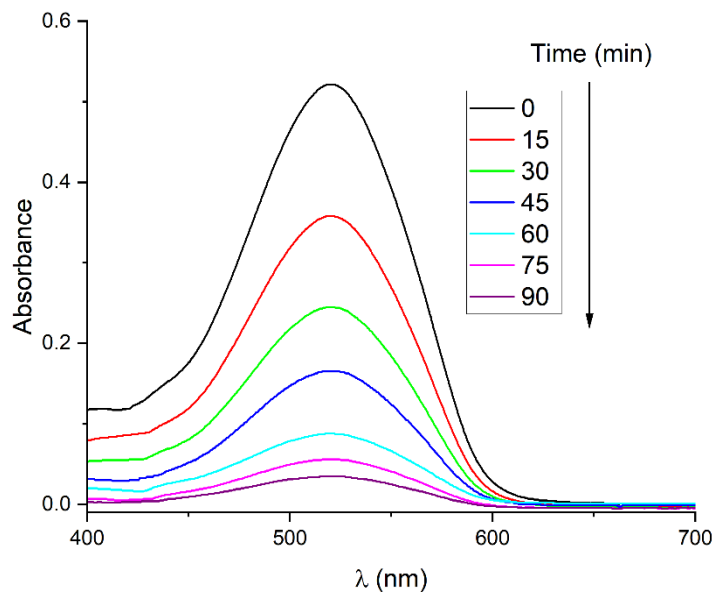

**Fig. S9** Time-dependent absorption spectra of AM in the presence of **2** under visible light irradiation.

---

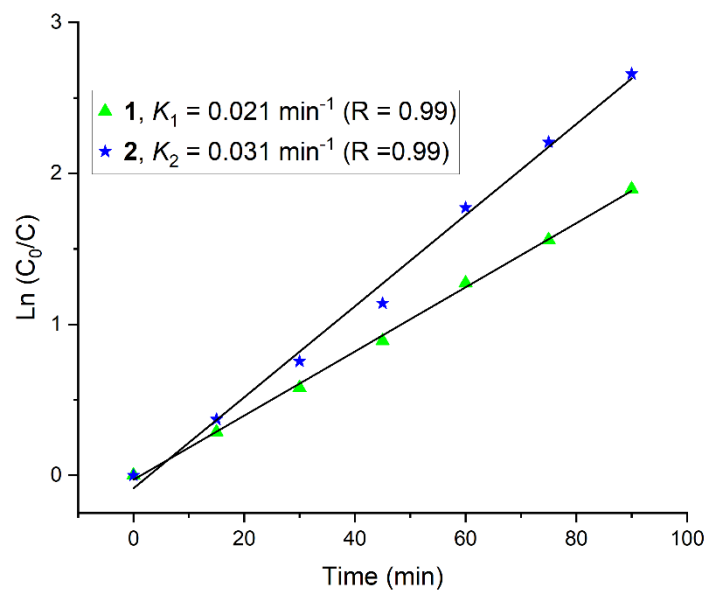

**Fig. S10** Kinetics-for the photocatalytic degradation of AM under visible light irradiation by photocatalysts **1** and **2**.

---

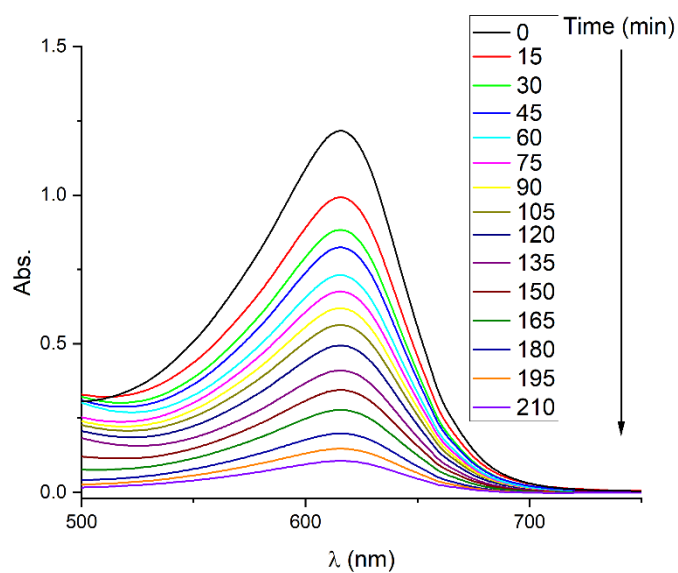

**Fig. S11** Time-dependent absorption spectra of BCG in the presence of **2** under visible light irradiation.

---

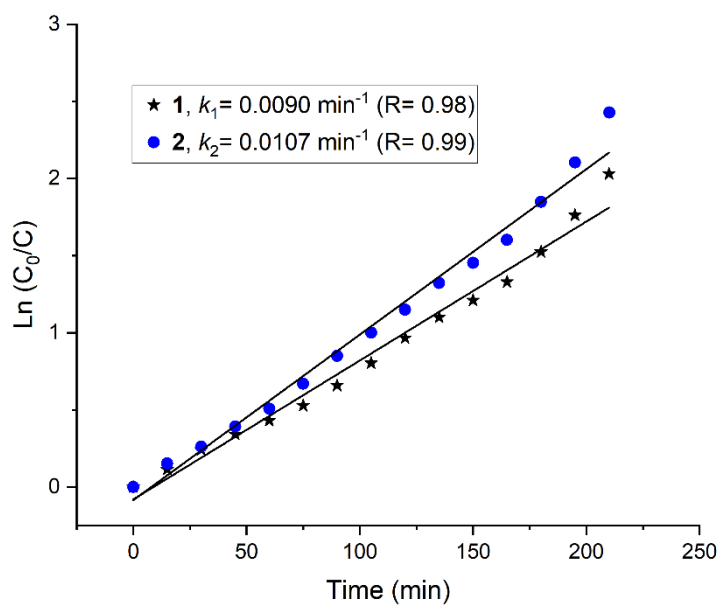

**Fig. S12** Kinetics for the photocatalytic degradation of BCG under visible light irradiation by photocatalysts **1** and **2**.

---

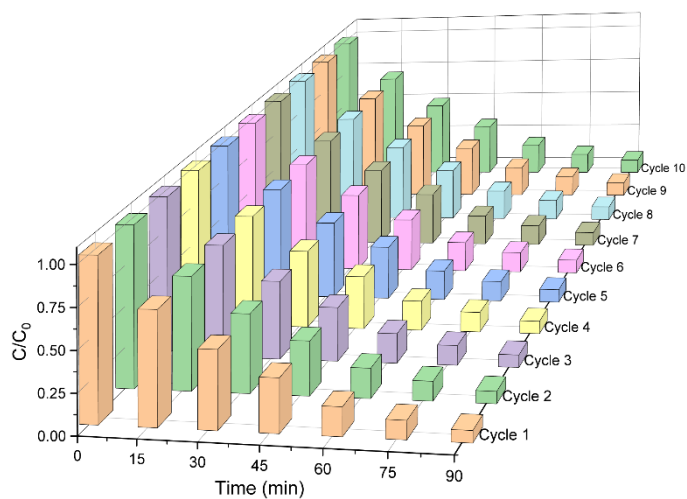

**Fig. S13** Catalytic cycles (up to 10 cycles) for photo-catalyst **2** for the degradation of AM dye.

---

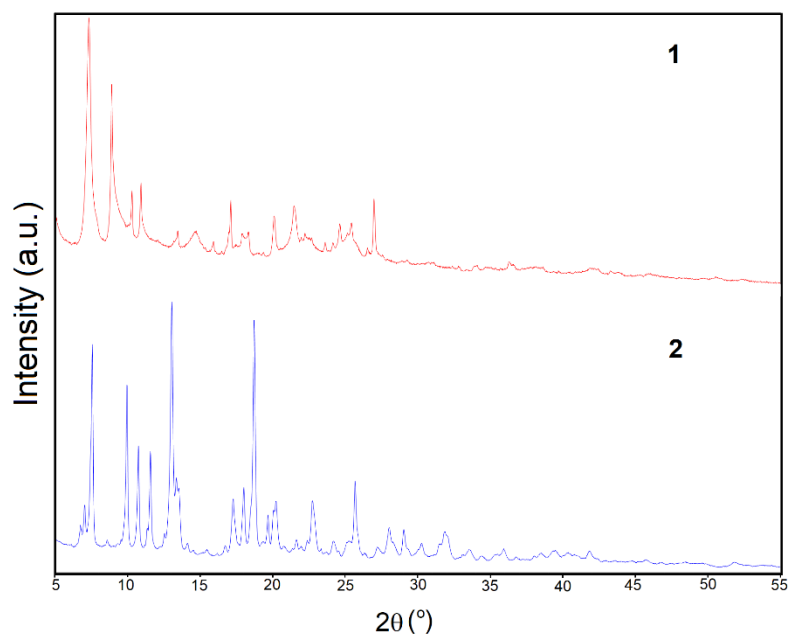

**Fig. S14** Powder X-ray diffraction (PXRD) patterns of **1** and **2** after use for photocatalytic degradation of AM dye.

---

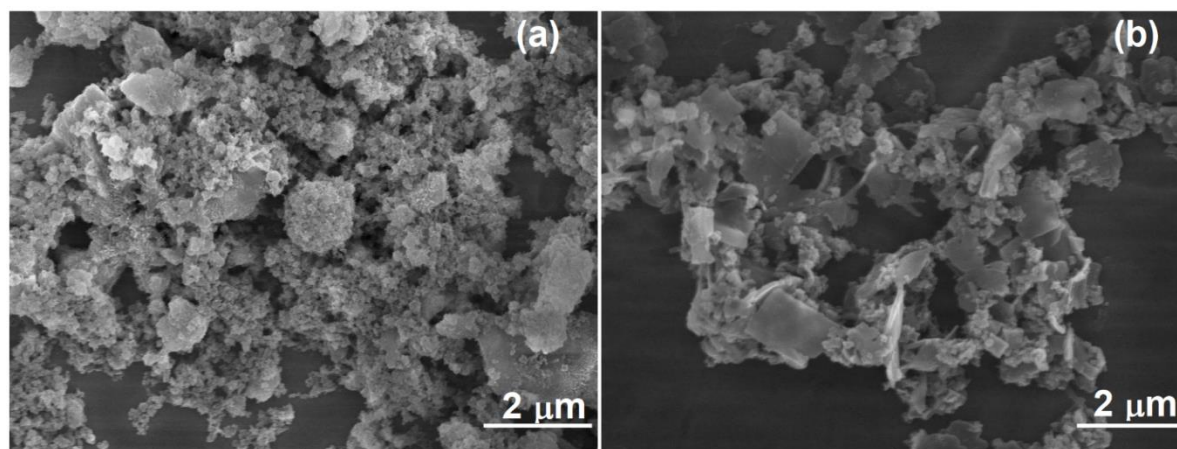

**Fig. S15** FE-SEM images of photocatalyst **1** and **2** after the degradation of AM dye.

---

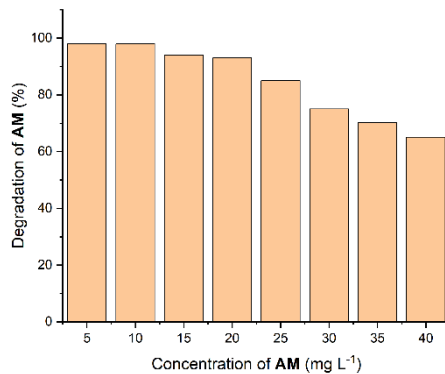

**Fig. S16** Concentration effect of AM dye on the photo-degradation by **2** (5 mg) within 90 min of visible light irradiation.

---

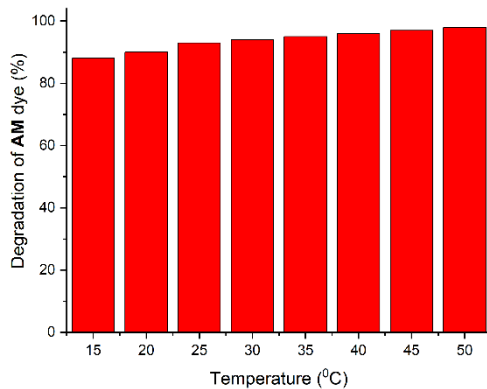

**Fig. S17** Effect of temperature on the degradation of AM dye by **2**.

---

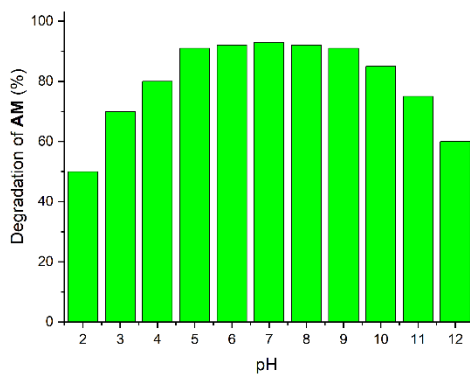

**Fig. S18** pH Effect of AM dye solution on the photo-degradation of by **2**.

---

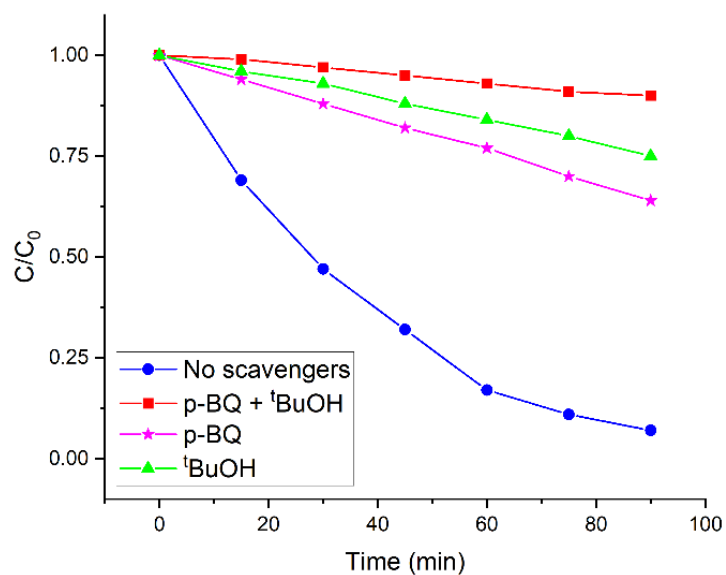

**Fig. S19** Effect of various scavengers on the degradation of AM dye in the presence of **2** under visible light irradiation.

---

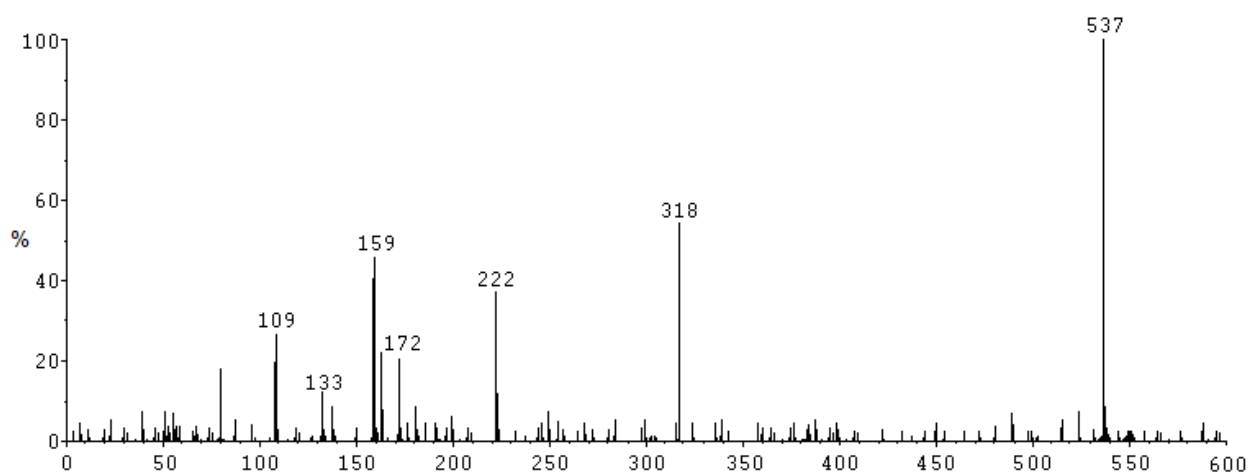

**Fig. S20** ESI-MS spectrum (negative ion mode) of the reaction mixture of AM in the presence of **2** after 60 min of visible light irradiation.

---
